# Supplementary material for: Neoadjuvant versus adjuvant imatinib in primary localized gastrointestinal stromal tumor
Source: PubMed Central journal article supplement — J Gastrointest Oncol. 2023 Jan 10;14(1):73–84. doi: 10.21037/jgo-22-931 (PMC10007957; doi:10.21037/jgo-22-931), 2023-01-10
Supplement: jgo-14-01-73-dss.pdf [file jgo-14-01-73-dss.pdf]

## Data Sharing Statement

|                     |                                                                                                                                                    |                                                                                                            |
|---------------------|----------------------------------------------------------------------------------------------------------------------------------------------------|------------------------------------------------------------------------------------------------------------|
| <b>Article Info</b> | <a href="https://dx.doi.org/10.21037/jgo-22-931">https://dx.doi.org/10.21037/jgo-22-931</a>                                                        |                                                                                                            |
| <b>Item</b>         | <b>Question</b>                                                                                                                                    | <b>Authors' Response<br/>(place "-" if not applicable)</b>                                                 |
| 1                   | Would you like to share data collected for your study to others?                                                                                   | Yes.                                                                                                       |
| 2                   | If not, would you like to share the reason for your decision?                                                                                      |                                                                                                            |
| 3                   | What data in particular will be shared?                                                                                                            | Data for efficacy analysis.                                                                                |
| 4                   | Any other documents will be share? Such as study protocol, statistical analysis plan, informed consent form, clinical study report, analytic code. | Yes, analytic code.                                                                                        |
| 5                   | When will data availability begin?                                                                                                                 | From the date the article is accepted for publishing.                                                      |
| 6                   | When will data availability end?                                                                                                                   | For 5 years.                                                                                               |
| 7                   | To whom will you share the data?                                                                                                                   | Readers.                                                                                                   |
| 8                   | For what type of analysis or purpose?                                                                                                              | Academic exchange.                                                                                         |
| 9                   | How or where can the data/documents be obtained?                                                                                                   | Email to corresponding author.<br><a href="mailto:dengyanh@mail.sysu.edu.cn">dengyanh@mail.sysu.edu.cn</a> |
| 10                  | Any other restrictions?                                                                                                                            | It depends on the corresponding author.                                                                    |
