# Supplementary material for: Neoadjuvant versus adjuvant imatinib in primary localized gastrointestinal stromal tumor
Source: PubMed Central journal article supplement — J Gastrointest Oncol. 2023 Jan 10;14(1):73–84. doi: 10.21037/jgo-22-931 (PMC10007957; doi:10.21037/jgo-22-931), 2023-01-10
Supplement: jgo-14-01-73-supplementary.pdf [file jgo-14-01-73-supplementary.pdf]

**Appendix 1 R Code**

R package code for inverse probability of treatment weighting (IPTW) adjusted Kaplan-Meier estimator, log-rank test, and Cox proportional hazards regression model

```

library(survminer)
library(survival)
library(tableone)
library(survey)
library(MatchIt)
library(reportReg)
library(foreign)

setwd("C:\\Users\\shilish\\Desktop\\psm")
testdata<-read.csv2("data1.1.csv",header = T,sep = ",")

testdata$DRFS<-as.numeric(testdata$DRFS)
testdata$OS<-as.numeric(testdata$OS)
testdata$RFS<-as.numeric(testdata$RFS)
testdata$DSS<-as.numeric(testdata$DSS)
testdata$LRF3<-as.numeric(testdata$LRF3)

testdata$age<-as.numeric(testdata$age)
testdata$sex<-factor(testdata$sex,labels=c("female","male"))
testdata$group<-factor(testdata$group,labels=c("A","B"))
testdata$SIZE3<-factor(testdata$SIZE3,labels=c("1","2","3"))

testdata$sym<-factor(testdata$sym,labels=c("1","2","3"))
testdata$sizeover3<-factor(testdata$sizeover3,labels=c("small","big"))
str(testdata)

fit <- survfit(Surv(DSS,DSSstatus) ~ group,
              data = testdata)

summary(fit)
fit

ggsurvplot(fit,
           data = testdata,
           conf.int = FALSE,
           pval = TRUE,
           surv.median.line = "hv",
           risk.table = TRUE,
           xlab = "Follow up time(month)",
           legend = c(0.8,0.75),
           legend.title = "ABC",
           legend.labs = c("A", "B"),
           break.x.by = 10)

```

```

attach(testdata)

attach(testdata)

vars<-c("sex","SIZE3")

psModel<-glm(group~sex+SIZE3,family=binomial(link="logit"),data=testdata)

testdata$ps=predict(psModel,type="response")

head(testdata$ps)

testdata$IPTW<-ifelse(testdata$group=="B",1/testdata$ps,1/(1-testdata$ps))

fit.IPTW<- survfit(Surv(DSS,DSSstatus) ~ group,
                  weights=testdata$IPTW,
                  data = testdata)

summary(fit.IPTW)

ggsurvplot(fit.IPTW,
           data = testdata,
           conf.int = FALSE,
           pval = TRUE,
           surv.median.line = "hv",
           risk.table = TRUE,
           xlab = "Follow up time(d)",
           legend = c(0.8,0.75),
           legend.title = "ABC",
           legend.labs = c("A", "B"),
           break.x.by = 10)

testdata1 <- testdata[testdata$Age45== "young",]
testdata2 <- testdata[testdata$Age45== "old",]

model.IPTW=coxph(Surv(DRFS,DRFSstatus)~group,data=testdata1,weights=testdata1$IPTW)
gsum=summary(model.IPTW)
gsum$coefficients
gsum$conf.int

```

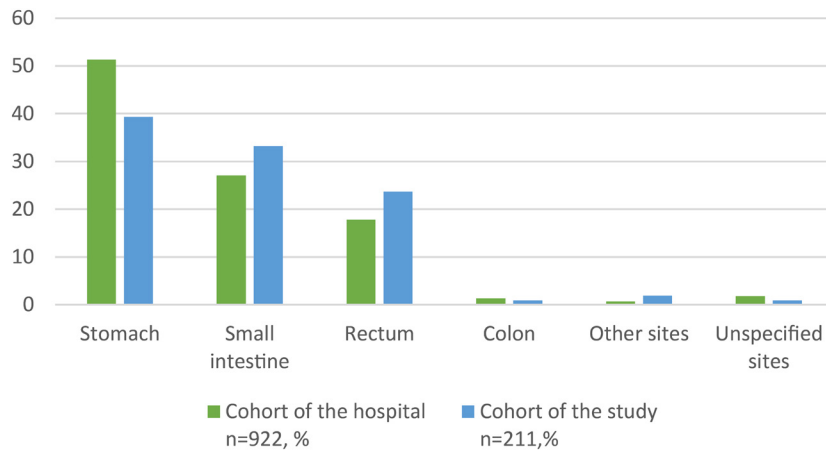

**Figure S1** Distribution of anatomical location of GIST tumors in the hospital and study cohorts. GIST, gastrointestinal stromal tumor.

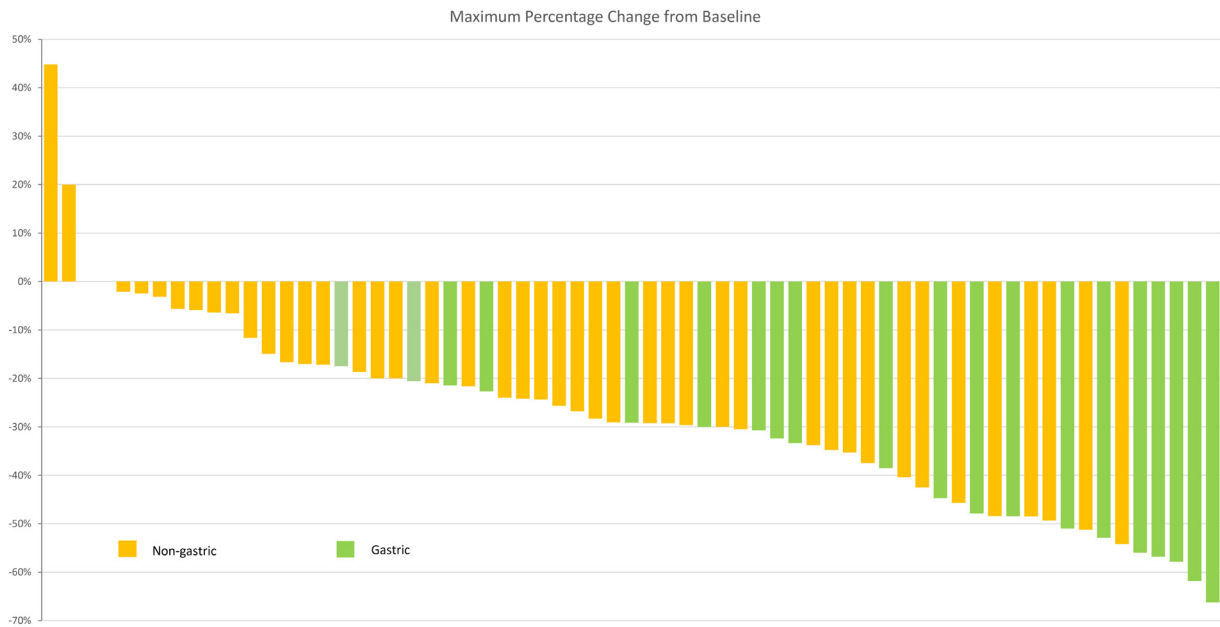

**Figure S2** Decrease in the sum of lesion diameter (SLD) prior to surgery, taking as reference the baseline SLD.

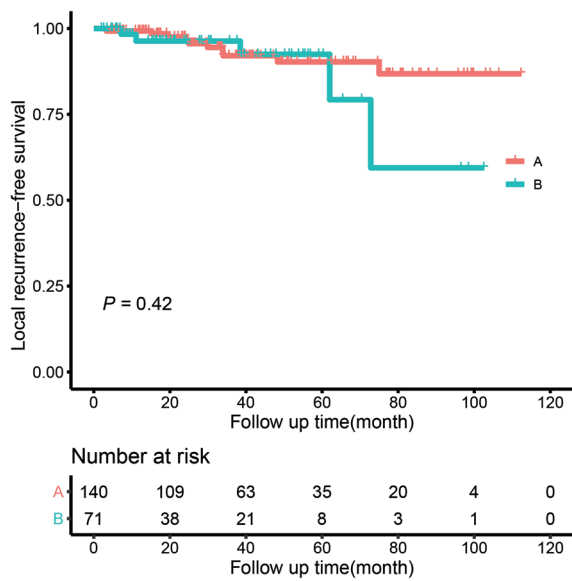

**A**

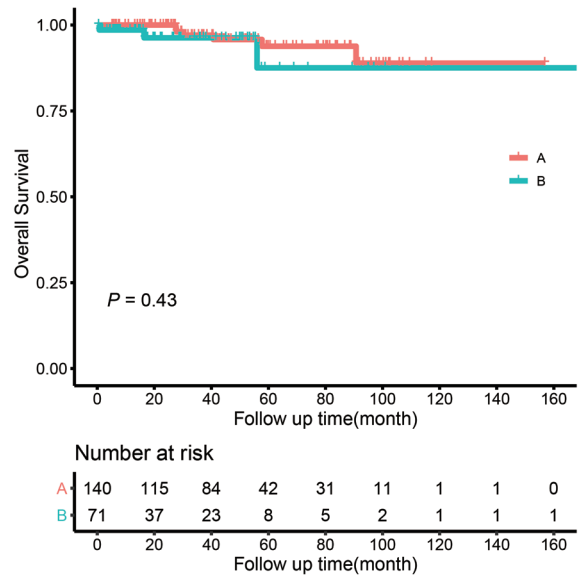

**B**

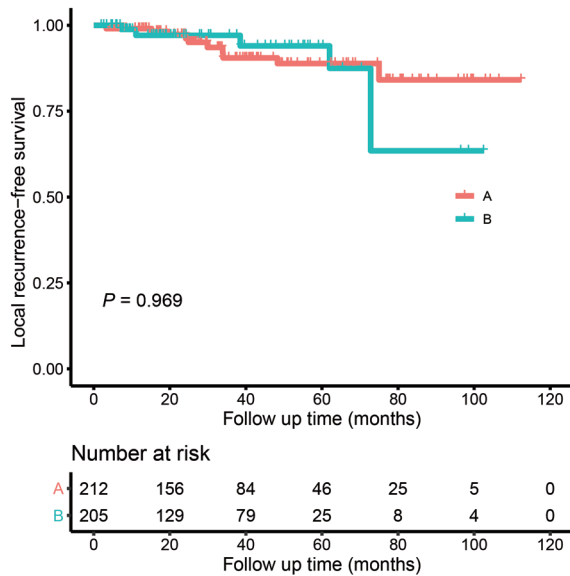

**C**

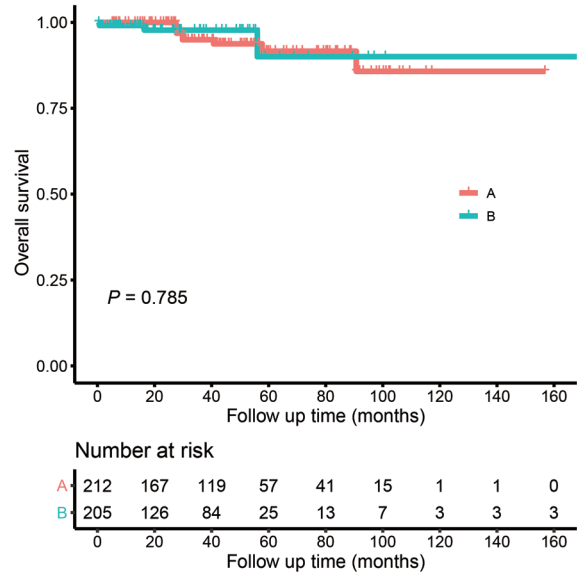

**D**

**Figure S3** Kaplan-Meier analyses of original cohorts (n=211) for (A) local recurrence-free survival (LRFS), (B) overall survival (OS), and Kaplan-Meier analyses of inverse probability of treatment weighting adjusted cohorts (n=417) for (C) LRFS, and (D) OS.

**Table S1** Distribution of anatomical location of GIST tumors in the cohorts of the hospital and the study

| Sites               | Cohort of the hospital n=922, % | Cohort of the study n=211, % |
|---------------------|---------------------------------|------------------------------|
| Stomach             | 51.3                            | 39.3                         |
| Small intestine     | 27.1                            | 33.2                         |
| Rectum              | 17.8                            | 23.7                         |
| Colon               | 1.3                             | 0.9                          |
| Other sites*        | 0.7                             | 1.9                          |
| Unspecified sites** | 1.8                             | 0.9                          |

\*, Other sites included esophagus, prostate and the omentum. \*\*, The tumors were found in abdominal or pelvic cavity with unknown anatomical location.

**Table S2** Risk stratification in groups A and group B

| Risk stratification | Group A: UR N=140 |      | Group B: NAT N=71 |     | Total N=211 |      |
|---------------------|-------------------|------|-------------------|-----|-------------|------|
|                     | N                 | %    | N                 | %   | N           | %    |
| High risk           | 84                | 60   | 49                | 69  | 133         | 63   |
| Intermediate risk   | 30                | 21.4 | NA                | NA  | 30          | 14.2 |
| Low risk            | 25                | 17.9 | NA                | NA  | 25          | 11.9 |
| Undetermined        | 1                 | 0.7  | 22                | 31  | 23          | 10.9 |
| Summary             | 140               | 100  | 71                | 100 | 211         | 100  |

UR, upfront resection; NAT, neoadjuvant therapy of imatinib; NA, not available.

**Table S3** Modified NIH consensus criteria for defining postsurgical risk of recurrence in localized GIST

| Risk category | Tumor longest diameter (cm) | Mitotic index, per 50 HPF | Primary tumor |
|---------------|-----------------------------|---------------------------|---------------|
| Very low      | <2                          | ≤5                        | Any           |
| Low           | 2–5                         | ≤5                        | Any           |
| Intermediate  | 2–5                         | >5                        | Gastric       |
|               | <5                          | 6–10                      | Any           |
|               | 5–10                        | ≤5                        | Gastric       |
| High          | Any                         | Any                       | Tumor rupture |
|               | >10                         | Any                       | Any           |
|               | Any                         | >10                       | Any           |
|               | >5                          | >5                        | Any           |
|               | 2–5                         | >5                        | Non-gastric   |
|               | 5–10                        | ≤5                        | Non-gastric   |

HPF, high power field.

**Table S4** Outcomes correlated to adjuvant therapy

| Category                                 | Group A UR+AT, n=140<br>(n, %) | Group B NAT+R+AT, n=70<br>(n, %) | Overall study population,<br>n=211 (n, %) | P value |
|------------------------------------------|--------------------------------|----------------------------------|-------------------------------------------|---------|
| DR after AT discontinuation              | 15 (10.7)                      | 1 (1.4)                          | 16 (7.6)                                  | 0.143   |
| LR after AT discontinuation              | 3 (2.1)                        | 3 (4.3)                          | 6 (2.9)                                   |         |
| LR+DR after AT discontinuation           | 1 (0.7)                        | 0 (0)                            | 1 (0.5)                                   |         |
| Recurrence free after AT discontinuation | 115 (82.1)                     | 63 (90)                          | 178 (84.8)                                |         |
| Event In AT                              | 6 (4.3)                        | 3 (4.3)*                         | 9 (4.3)                                   |         |

\*The 3 cases in group B discontinued adjuvant treatment due to events including 2 recurrence and 1 accidental death from a heart attack. UR, upfront resection; NAT, neoadjuvant therapy; AT, adjuvant therapy; DR, distant recurrence; LR, local recurrence; Event In AT, events occurred during AT and caused AT discontinuation.

**Table S5** Distant recurrence correlated to adjuvant therapy

| Category                         | Group A UR+AT, n=140<br>(n, %) | Group B NAT+R+AT, n=70<br>(n, %) | Overall study population, n=211<br>(n, %) | P value |
|----------------------------------|--------------------------------|----------------------------------|-------------------------------------------|---------|
| DR after AT discontinuation      | 16 (11.4)                      | 1 (1.4)                          | 17 (8.1)                                  | 0.043   |
| DR free after AT discontinuation | 118 (84.3)                     | 66 (94.3)                        | 184 (87.6)                                |         |
| Event In AT                      | 6 (4.3)                        | 3 (4.3)*                         | 9 (4.3)                                   |         |

\*The 3 cases in group B discontinued adjuvant treatment due to events including 2 recurrence and 1 accidental death from a heart attack. UR, upfront resection; NAT, neoadjuvant therapy; AT, adjuvant therapy; DR, distant recurrence; Event In AT, events occurred during AT and caused AT discontinuation.

**Table S6** DRFS and LRFS status in the cohort (n=211)

| LRFS status | DRFS status |    | Sum |
|-------------|-------------|----|-----|
|             | No DR       | DR |     |
| No LR       | 180         | 16 | 196 |
| LR          | 8           | 7  | 15  |
| Sum         | 188         | 23 | 211 |

DRFS, distant recurrence free survival; LRFS, local recurrence free survival; DR, distant recurrence; LR, local recurrence.

**Table S7** DRFS and LRFS status in the cohort by groups (n=211)

|                   | LRFS status | DRFS status |    | Sum |
|-------------------|-------------|-------------|----|-----|
|                   |             | No DR       | DR |     |
| Group A: UR+AT    | No LR       | 115         | 15 | 130 |
|                   | LR          | 5           | 5  | 10  |
|                   | Sum         | 120         | 20 | 140 |
| Group B: NAT+R+AT | No LR       | 65          | 1  | 66  |
|                   | LR          | 3           | 2  | 5   |
|                   | Sum         | 68          | 3  | 71  |

DRFS, distant recurrence free survival; LRFS, local recurrence free survival; DR, distant recurrence; LR, local recurrence; UR, upfront resection; NAT, neoadjuvant therapy; AT, adjuvant therapy; R, resection.

**Table S8** P value for interaction between neoadjuvant imatinib and tumor location, calculated with Cox proportional hazards model

| Variables    | Category   | DRFS  |               |         |
|--------------|------------|-------|---------------|---------|
|              |            | HR    | 95% CI        | P value |
| NAT          | Yes        | 0.056 | 0.006–0.51    | 0.011*  |
| Size, cm     | ≤5         | 0.241 | 0.069–0.833   | 0.025*  |
|              | 6–10       | 0.435 | 0.17–1.113    | 0.083   |
|              | >10        |       |               |         |
| AT           | Yes        | 0.125 | 0.028–0.566   | 0.007*  |
| Location     | Gastric    | 0.271 | 0.078–0.939   | 0.039*  |
|              | Nongastric |       |               |         |
| NAT*Location |            | 54.95 | 3.199–943.785 | 0.006*  |

\* denotes statistically significant; DRFS: distant recurrence-free survival.

**Table S9** DRFS subgroup analysis stratified by tumor location, calculated using Cox proportional-hazards model

| Location   | Variable | DRFS  |                |         |
|------------|----------|-------|----------------|---------|
|            |          | HR    | 95% CI         | P value |
| Gastric    | NAT      | 5.013 | (0.822–30.556) | 0.08    |
| Nongastric | NAT      | 0.131 | (0.017–0.989)  | 0.049*  |

\* denotes statistically significant; DRFS: distant recurrence-free survival

**Table S10** COX regression on treatment groups after IPTW adjustment

| Variables            | DRFS |               |        | LRFS |              |       | OS    |               |      |
|----------------------|------|---------------|--------|------|--------------|-------|-------|---------------|------|
|                      | HR   | 95% CI        | P      | HR   | 95% CI       | P     | HR    | 95% CI        | P    |
| Neoadjuvant imatinib | 0.26 | (0.076–0.905) | 0.048* | 1.02 | (0.314–3.34) | 0.969 | 2.039 | (0.471–8.818) | 0.34 |

\*IPTW-adjustment for location, tumor size and adjuvant imatinib. IPTW, inverse probability of treatment weighting; DRFS, distant recurrence-free survival; LRFS, local recurrence-free survival.

**Table S11** Size distribution in groups A and B by location

| Location   | Variable | Category | Group A UR+AT, n=140 n (%) | Group B NAT+R+AT, n=70 n (%) | P      |
|------------|----------|----------|----------------------------|------------------------------|--------|
| Gastric    | Size, cm | ≤5       | 26 (42.6)                  | 1 (4.5)                      | <0.001 |
|            |          | 5–10     | 30 (49.2)                  | 10 (45.5)                    |        |
|            |          | >10      | 5 (8.2)                    | 11 (50)                      |        |
| Nongastric | Size, cm | ≤5       | 19 (24.1)                  | 14 (29.2)                    | 0.578  |
|            |          | 5–10     | 41 (51.9)                  | 26 (54.2)                    |        |
|            |          | >10      | 19 (24.1)                  | 8 (16.7)                     |        |

UR, upfront resection; NAT, neoadjuvant therapy; R, resection; AT, adjuvant therapy.

**Table S12** High-risk in groups A and B by location

| Location    | Risk classification | Group A UR+AT, n=140 n (%) | Group B NAT+R+AT, n=70 n (%) | P     |
|-------------|---------------------|----------------------------|------------------------------|-------|
| Gastric     | High risk           | 15 (24.6)                  | 14 (63.6)                    | 0.001 |
|             | Non high or unknown | 46 (75.4)                  | 8 (36.4)                     |       |
| Non-gastric | High risk           | 69 (87.3)                  | 34 (70.8)                    | 0.021 |
|             | Non high or unknown | 10 (12.7)                  | 14 (29.2)                    |       |

UR, upfront resection; NAT, neoadjuvant therapy; R, resection; AT, adjuvant therapy.
